# Supplementary material for: Progress on the research and development of plague vaccines with a call to action
Source: PubMed Central journal article supplement (PMC11379892; doi:10.1038/s41541-024-00958-1), 2024-09-07
Supplement: 41541_2024_958_MOESM1_ESM.pdf [file 41541_2024_958_MOESM1_ESM.pdf]

OXFORD UNIVERSITY PRESS LICENSE  
TERMS AND CONDITIONS

Mar 21, 2024

---

This Agreement between Dr. Ethel Williamson ("You") and Oxford University Press ("Oxford University Press") consists of your license details and the terms and conditions provided by Oxford University Press and Copyright Clearance Center.

|                              |                                                             |
|------------------------------|-------------------------------------------------------------|
| License Number               | 5753521304382                                               |
| License date                 | Mar 21, 2024                                                |
| Licensed Content Publisher   | Oxford University Press                                     |
| Licensed Content Publication | Clinical & Experimental Immunology                          |
| Licensed Content Title       | Vaccines for emerging pathogens:<br>prospects for licensure |
| Licensed Content Author      | Williamson, E D; Westlake, G E                              |
| Licensed Content Date        | Apr 11, 2019                                                |
| Licensed Content Volume      | 198                                                         |

|                                                        |                            |
|--------------------------------------------------------|----------------------------|
| Licensed Content Issue                                 | 2                          |
| Type of Use                                            | Journal                    |
| Requestor type                                         | Author of this OUP content |
| Pharmaceutical support or sponsorship for this project | No                         |
| Format                                                 | Electronic                 |
| Portion                                                | Figure/table               |
| Number of figures/tables                               | 1                          |
| Will you be translating?                               | No                         |
| Circulation/distribution                               | 1                          |
| Title of new article                                   | R&D of plague vaccines     |
| Lead author                                            | Ethel D. Williamson        |
| Title of targeted journal                              | NPJ Vaccines               |

|                           |                                                                                                                                                         |
|---------------------------|---------------------------------------------------------------------------------------------------------------------------------------------------------|
| Publisher                 | Springer Nature                                                                                                                                         |
| Expected publication date | Jun 2024                                                                                                                                                |
| Order reference number    | 0324                                                                                                                                                    |
| Portions                  | Figure 2                                                                                                                                                |
| Requestor Location        | Dr. Ethel Williamson<br>Dairy Farmhouse<br>West Winterslow<br>Salisbury<br>Salisbury, Wiltshire SP5 1RE<br>United Kingdom<br>Attn: Dr. Ethel Williamson |
| Publisher Tax ID          | GB125506730                                                                                                                                             |
| Total                     | 0.00 GBP                                                                                                                                                |
| Terms and Conditions      |                                                                                                                                                         |

**STANDARD TERMS AND CONDITIONS FOR REPRODUCTION OF  
MATERIAL FROM AN OXFORD UNIVERSITY PRESS JOURNAL**

1. Use of the material is restricted to the type of use specified in your order details.
2. This permission covers the use of the material in the **English** language in the following territory: *world*. If you have requested additional permission to translate this material, the terms and conditions of this reuse will be set out in clause 12.
